# Supplementary material
Source: Springer Nature journal article supplement (https://www.springermedizin.de/resource/supplementary/12880_2006_9_MOESM3_ESM.pdf/9450402)

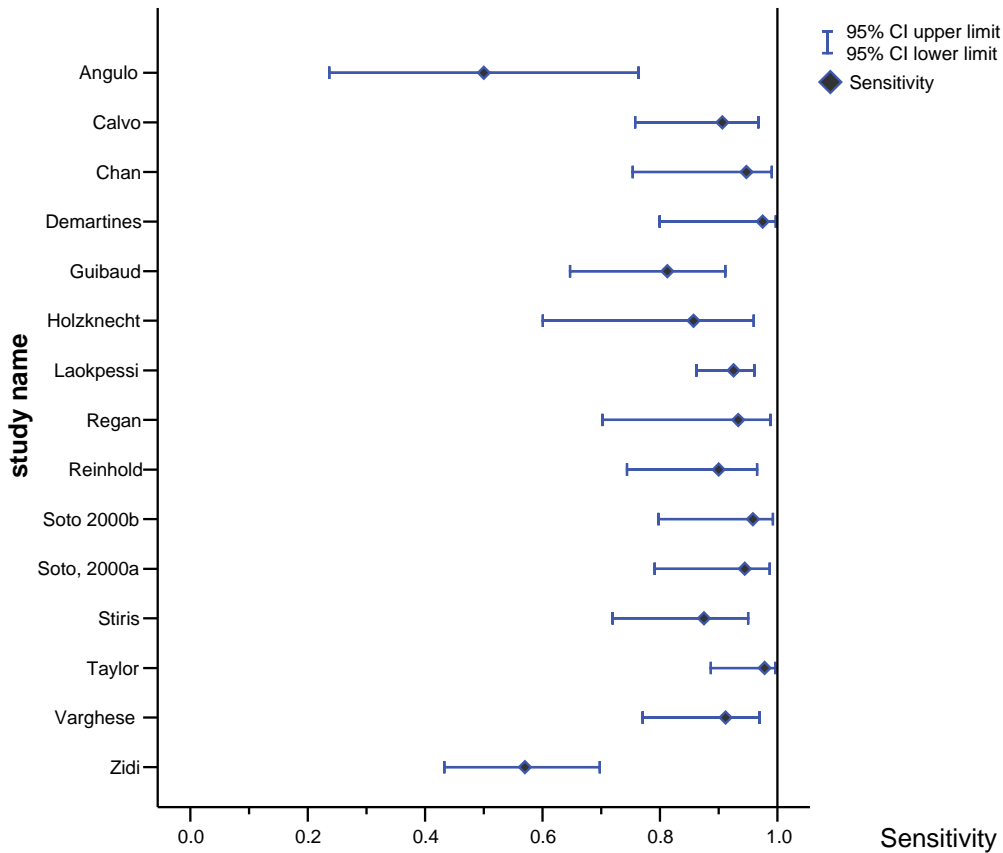

$\chi^2$  test for heterogeneity = 70.8 on 14df,  $p < 0.0001$ .

Supplement: MOESM3 [file 9450402]
